# Supplementary material
Source: PubMed Central journal article supplement (PMC2270479)

**A**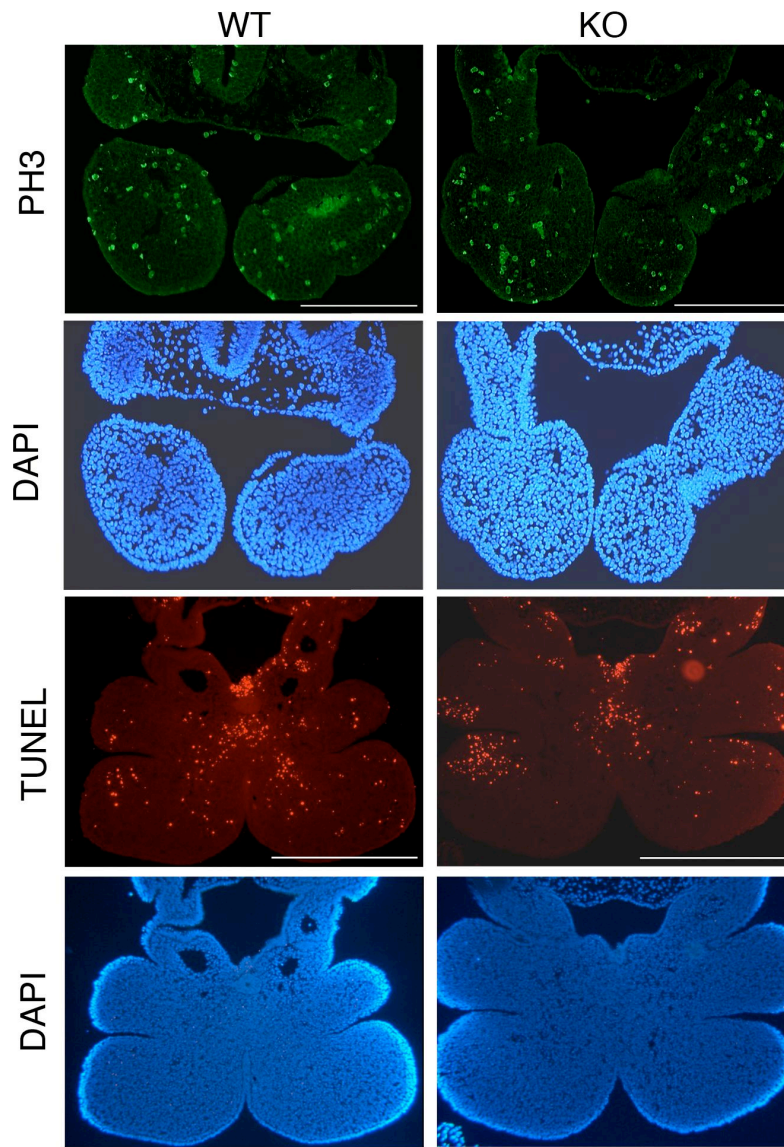**B**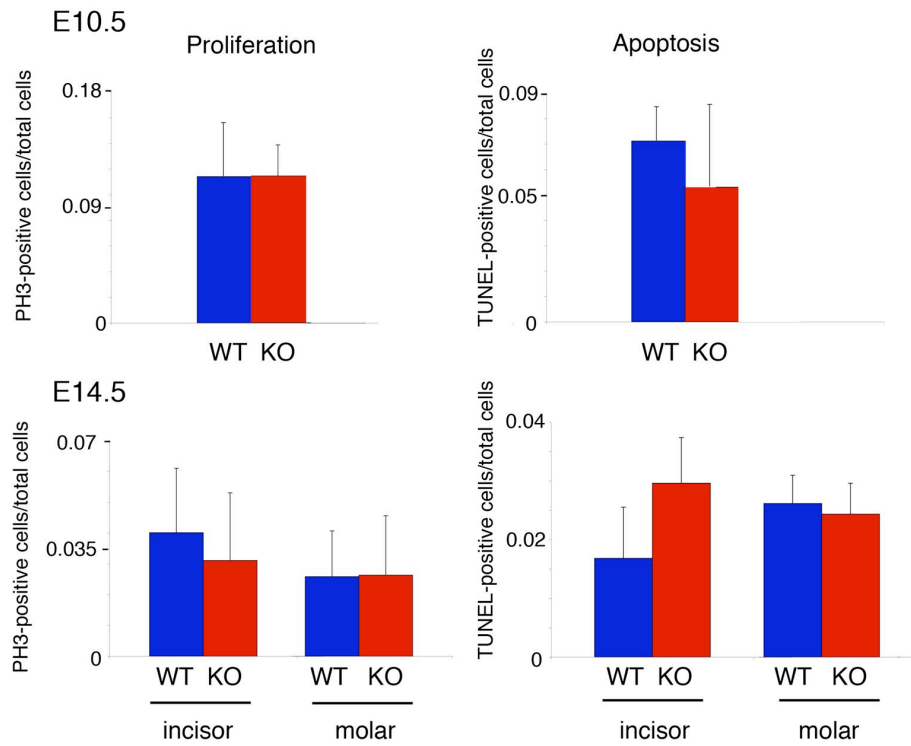

Supplement: NIHMS31905-supplement-02.pdf [file NIHMS31905-supplement-02.pdf]

WT

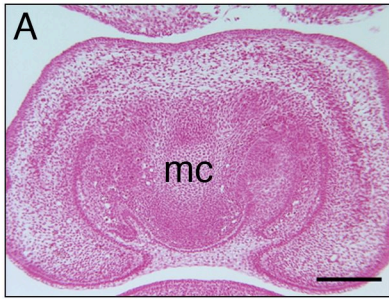

*Hand2*<sup>BA/BA</sup>

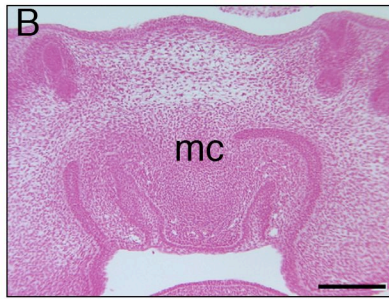

*Hand1*<sup>NCKO/KO</sup>;*Hand2*<sup>KO/+</sup>

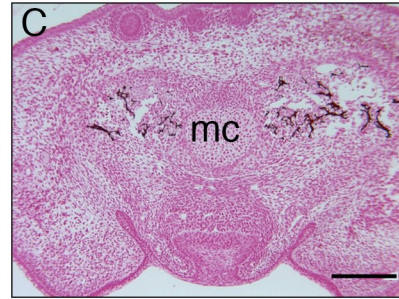

Supplement: NIHMS31905-supplement-03.pdf [file NIHMS31905-supplement-03.pdf]
